# Supplementary material
Source: ML conference proceedings conference paper supplement (https://openaccess.thecvf.com/content/CVPR2024/html/Xu_Perturbing_Attention_Gives_CVPR_2024_paper.html)
Supplement: Supplementary file 1 [file Xu_Perturbing_Attention_Gives_CVPR_2024_supplemental.pdf]

# Perturbing Attention Gives You More Bang for the Buck: Subtle Imaging Perturbations That Efficiently Fool Customized Diffusion Models

## Supplementary Material

### A. Hyperparameters

Table A1. Hyperparameters for different attackers. The parameters for Anti-DreamBooth (aspl) and Mist are set to their default configurations. Anti. denotes Anti-DreamBooth.

| parameters    | CAAT               | Anti               | Mist   |
|---------------|--------------------|--------------------|--------|
| train steps   | 250                | 50                 | 100    |
| learning rate | $1 \times 10^{-5}$ | $5 \times 10^{-7}$ | -      |
| $\alpha$      | $5 \times 10^{-3}$ | $5 \times 10^{-3}$ | 2/255  |
| $\eta$        | 0.1                | 0.05               | 32/255 |

Table A2. Hyperparameters of diffusion models, which follow their default configurations. CD, BD and TI denote Custom Diffusion, DreamBooth, and Textual Inversion, respectively.

| parameters    | CD                 | DB                 | SVDiff             | TI                 |
|---------------|--------------------|--------------------|--------------------|--------------------|
| train steps   | 250                | 1000               | 500                | 1500               |
| learning rate | $1 \times 10^{-5}$ | $5 \times 10^{-7}$ | $1 \times 10^{-3}$ | $5 \times 10^{-4}$ |
| batchsize     | 2                  | 1                  | 1                  | 1                  |

### B. More Task

We studied the effects of different prompts on different subjects (e.g., barn, dogs, and toy). The results in Fig. B1 show no influence and that CAAT can consistently degrade the quality of generated images (first two lines have huge noise) and disrupt subject learning ability (the subjects of the last two lines are inconsistent).

### C. Robustness

We conducted more experiments with four image perturbation methods in Tab. C1 to demonstrate the robustness of CAAT. We used:

- *Random noise* has a scale of 0.05.
- *Quantization* involves reducing an 8-bit image to a 6-bit image.
- *Gaussian blur* uses a kernel size of 3x3 with  $\sigma$  set to 0.05.
- *JPEG* image processing is implemented using the OpenCV2 library.

Table C1. Robustness assessment by different image perturbation methods. **Bold** is the best score.

| Method        | T2I generation models |             |              |            |             |             |              |            |
|---------------|-----------------------|-------------|--------------|------------|-------------|-------------|--------------|------------|
|               | Custom Diffusion      |             |              |            | DreamBooth  |             |              |            |
|               | FS↓                   | FC↓         | IR↓          | FID↑       | FS↓         | FC↓         | IR↓          | FID↑       |
| clean         | 1.0                   | 0.52        | 0.47         | 195        | 0.98        | 0.52        | 0.53         | 179        |
| CAAT          | 1.0                   | 0.42        | <b>-0.36</b> | <b>250</b> | <b>0.64</b> | <b>0.32</b> | <b>-0.14</b> | <b>371</b> |
| random noise  | 1.0                   | 0.42        | -0.10        | 222        | 0.97        | 0.42        | 0.31         | 270        |
| quantization  | 1.0                   | 0.44        | -0.15        | 202        | 0.99        | 0.45        | 0.42         | 201        |
| JPEG          | 1.0                   | <b>0.40</b> | -0.20        | 218        | 0.80        | 0.36        | 0.10         | 328        |
| Gaussian blur | 1.0                   | <b>0.40</b> | -0.25        | 229        | 0.75        | 0.33        | -0.03        | 347        |

### D. Separation vs. simultaneous

When updating parameters and adding noise, we considered doing both simultaneously (See Sec. 3.3) versus separately, aiming to find a superior method. For the latter, We alternated between 10 steps of model parameter updates and 10 steps of PGD, each for 250 steps (same as CAAT), with the results shown in Tab. D1. The experimental results indicate that both optimization methods achieved sufficiently good results, making it difficult to compare them. Moreover, for N-step training, simultaneous optimization requires N backward steps since we can reuse the gradients for attacking, while separation requires 2N. The goal of CAAT is to be lightweight and fast, introducing extra overhead is contrary to our philosophy. Therefore, we carried out the optimizations simultaneously.

Table D1. Comparison of simultaneous optimization and separation optimization. *Separated* involves alternating model optimization and adding noise.

| Method    | T2I generation models |             |              |            |             |             |              |            |
|-----------|-----------------------|-------------|--------------|------------|-------------|-------------|--------------|------------|
|           | Custom Diffusion      |             |              |            | DreamBooth  |             |              |            |
|           | FS↓                   | FC↓         | IR↓          | FID↑       | FS↓         | FC↓         | IR↓          | FID↑       |
| clean     | 1.0                   | 0.52        | 0.47         | 195        | 0.98        | 0.52        | 0.53         | 179        |
| CAAT      | 1.0                   | 0.42        | <b>-0.36</b> | <b>250</b> | <b>0.64</b> | <b>0.32</b> | <b>-0.14</b> | <b>371</b> |
| Separated | <b>0.99</b>           | <b>0.39</b> | -0.25        | 238        | 0.72        | <b>0.32</b> | -0.10        | 330        |

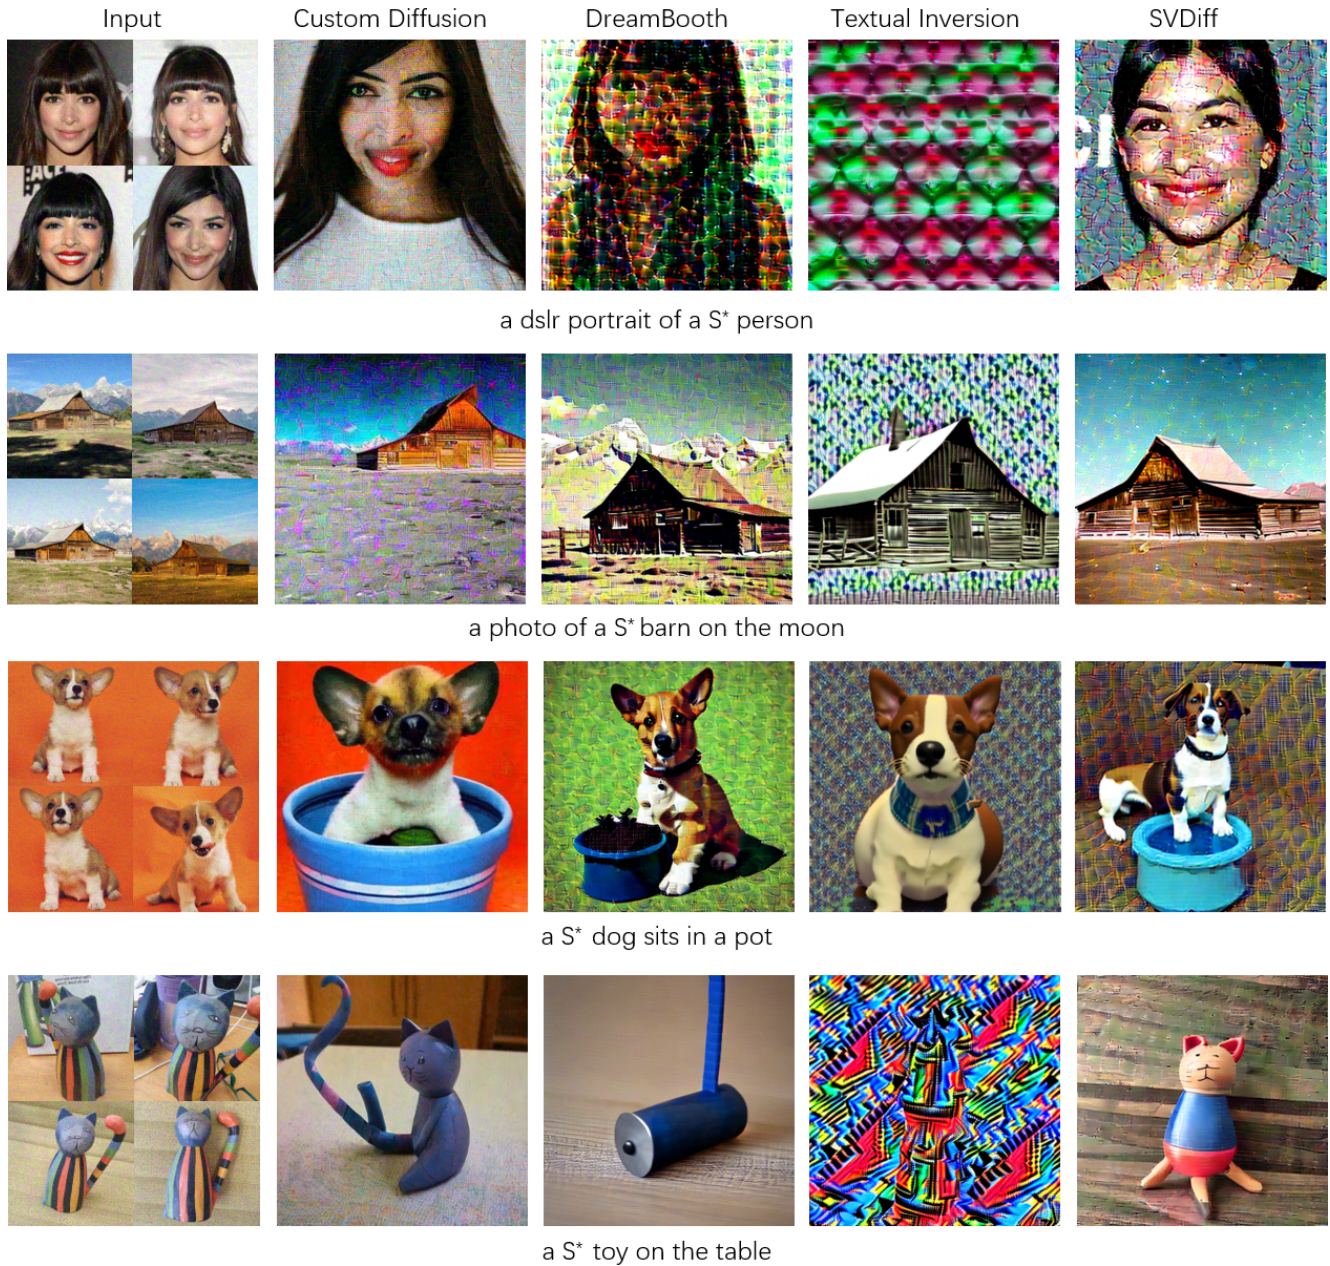

Figure B1. The images generated by different T2I diffusion models with different prompts and tasks.  $S^*$  denotes special token of different T2I models.
